# Supplementary material for: Detection of atrial fibrillation in primary care with radial pulse palpation, electronic blood pressure measurement and handheld single-lead electrocardiography: a diagnostic accuracy study
Source: HighWire-hosted journal article supplement (doi:10.1136/bmjopen-2021-059172), 2022-06-01
Supplement: bmjopen-2021-059172supp001_data_supplement.pdf [file bmjopen-2021-059172supp001_data_supplement.pdf]

## Appendix 1

*Comparison of characteristics of participants<sup>a</sup> versus non-participants within the eligible intention-to-screen population of the D<sub>2</sub>AF study.*

| Characteristic          | Participants<br>(n=4339) | Non-participants<br>(n=5061) | p-value |
|-------------------------|--------------------------|------------------------------|---------|
| Female, n (%)           | 2336 (53.8)              | 2831 (55.9)                  | 0.041   |
| Age in years, M (SD)    | 73.5 (5.5)               | 76.7 (7.4)                   | <0.001  |
| History <sup>b</sup>    |                          |                              |         |
| Hypertension, n (%)     | 2212 (51.1)              | 2416 (48.3)                  | 0.008   |
| Stroke/TIA, n (%)       | 329 (7.6)                | 603 (12.1)                   | <0.001  |
| Diabetes, n (%)         | 783 (18.1)               | 1029 (20.6)                  | 0.002   |
| Heart failure, n (%)    | 80 (1.8)                 | 304 (6.1)                    | <0.001  |
| Thromboembolism, n (%)  | 200 (4.8)                | 271 (5.4)                    | 0.077   |
| Vascular disease, n (%) | 644 (14.9)               | 968 (19.4)                   | <0.001  |

Abbreviations: M (mean), TIA (transient ischemic attack), SD (standard deviation).

<sup>a</sup> In the current diagnostic accuracy study, we analyse 4339 patients whereas we included 4106 patients in the intention-to-screen arm of the D<sub>2</sub>AF randomized controlled trial. The screening of 233 patients occurred after the end of the study year, and they were therefore not eligible for the randomized controlled trial. However, we did include them in the diagnostic accuracy study.

<sup>b</sup> For nine participants and 64 non-participants, history was missing.
