# Supplementary material for: Detection of atrial fibrillation in primary care with radial pulse palpation, electronic blood pressure measurement and handheld single-lead electrocardiography: a diagnostic accuracy study
Source: HighWire-hosted journal article supplement (doi:10.1136/bmjopen-2021-059172), 2022-06-01
Supplement: bmjopen-2021-059172supp004_data_supplement.pdf [file bmjopen-2021-059172supp004_data_supplement.pdf]

#### Appendix 4

Diagnostic test results for five different index test combinations in the complete cases receiving a 12 lead ECG as reference test (n=793) and the pooled data after multiple imputation (n=4339)<sup>a</sup>.

| Index test combinations | Combined test result                 | 12 lead ECG results         |       |       |                          |       |       |
|-------------------------|--------------------------------------|-----------------------------|-------|-------|--------------------------|-------|-------|
|                         |                                      | Complete cases <sup>b</sup> |       |       | Pooled data <sup>c</sup> |       |       |
|                         |                                      | AF                          | No AF | Total | AF                       | No AF | Total |
| <b>A</b>                | $\geq 1$ index test +                | 30                          | 455   | 485   | 32                       | 499   | 531   |
|                         | All index tests -                    | 0                           | 308   | 308   | 3                        | 3805  | 3808  |
|                         | Total                                | 30                          | 763   | 793   | 35                       | 4304  | 4339  |
| <b>B</b>                | Radial pulse and/or MyDiagnostick +  | 30                          | 384   | 414   | 32                       | 413   | 445   |
|                         | Radial pulse and MyDiagnostick -     | 0                           | 379   | 379   | 3                        | 3891  | 3894  |
|                         | Total                                | 30                          | 763   | 793   | 35                       | 4304  | 4339  |
| <b>C</b>                | Radial pulse and/or WatchBP Home A + | 27                          | 412   | 439   | 29                       | 448   | 477   |
|                         | Radial pulse and WatchBP Home A -    | 3                           | 343   | 346   | 6                        | 3856  | 3862  |
|                         | Total                                | 30                          | 755   | 785   | 35                       | 4304  | 4339  |
| <b>D</b>                | Radial pulse and MyDiagnostick +     | 20                          | 32    | 52    | 21                       | 32    | 53    |
|                         | Radial pulse and/or MyDiagnostick -  | 10                          | 731   | 741   | 14                       | 4272  | 4286  |
|                         | Total                                | 30                          | 763   | 793   | 35                       | 4304  | 4339  |
| <b>E</b>                | Radial pulse and WatchBP Home A +    | 12                          | 44    | 56    | 17                       | 56    | 73    |
|                         | Radial pulse and/or WatchBP Home A - | 13                          | 668   | 681   | 18                       | 4248  | 4266  |
|                         | Total                                | 25                          | 712   | 737   | 35                       | 4304  | 4339  |

Abbreviations: AF (atrial fibrillation).

<sup>a</sup>By protocol, to limit verification bias, we strived to perform the reference test (12 lead ECG) in a 10% random sample of patients with three negative index tests. In addition, to calculate all relevant diagnostic parameters, we used multiple imputation in the analysis.

<sup>b</sup> The ‘complete cases’ present the patients actually receiving the 12 lead ECG, i.e. the patients with  $\geq 1$  positive index test plus the random sample of patients with three negative index tests.

<sup>c</sup> The ‘pooled data’ present the computed results (rounded numbers) of 100 datasets with 10 iterations per set, created with multiple imputation (see main text).
